# Supplementary material for: CRISPR/Cas9-mediated gene knockout reveals a guardian role of NF-κB/RelA in maintaining the homeostasis of human vascular cells
Source: PubMed Central journal article supplement (PMC6208479; doi:10.1007/s13238-018-0560-5), 2018-07-02
Supplement: 13238_2018_560_MOESM1_ESM.pdf [file 13238_2018_560_MOESM1_ESM.pdf]

Figure S1. Biological processes modulated by NF- $\kappa$ B in various vascular cells under inflammatory conditions.

- a) Heatmap showing the pairwise correlation of RNA-seq signals between WT and *RelA*<sup>-/-</sup> vascular cells under basal condition and upon TNF $\alpha$  treatment. Pearson correlation coefficient (R) is presented to the right.
- b) Western blot analysis of RelA protein levels in WT VECs, VSMCs and MSCs under basal condition (n=3). The number below represents the relative expression of RelA in various vascular cells.  $\beta$ -Actin was used as a loading control.
- c) Ki67 immunostaining of WT MSCs infected with shCLEC11A viruses. shGL2 viruses were used as a negative control. DNA was labeled by Hoechst 33342. \*\*\*p< 0.001. Scale bar, 30  $\mu$ m.
- d) GO enrichment analysis of upregulated genes only in WT VECs upon TNF $\alpha$  treatment. Enriched top 10 GO biological processes are presented with dots. The area of dot represents the count of genes in the terms.
- e) GO enrichment analysis of upregulated genes upon TNF $\alpha$  treatment only in WT VSMCs.
- f) GO enrichment analysis of upregulated genes upon TNF $\alpha$  treatment only in WT MSCs.
- g) GO enrichment analysis of upregulated genes upon TNF $\alpha$  induction among WT but not *RelA*<sup>-/-</sup> VECs, VSMCs and MSCs.

Figure S2. RNA-seq analysis identified I $\kappa$ B $\alpha$ -regulated genes in vascular cells.

- a) Correlation analysis of RNA-seq replicates of WT and *I $\kappa$ B $\alpha$* <sup>-/-</sup> VECs, VSMCs, and MSCs under basal and TNF $\alpha$ -treated conditions. Pearson correlation coefficient (R) is presented.
- b) Overlapping of upregulated (left) and downregulated (right) genes in *I $\kappa$ B $\alpha$* <sup>-/-</sup> VECs, VSMCs, and MSCs under basal condition.
- c) GO enrichment analysis of differentially expressed genes between WT and *I $\kappa$ B $\alpha$* <sup>-/-</sup> in VECs under basal condition. Enriched GO terms of upregulated and downregulated genes are marked in red and green color, respectively.
- d) GO enrichment analysis of differentially expressed genes between WT and *I $\kappa$ B $\alpha$* <sup>-/-</sup> in VSMCs under basal condition.
- e) GO enrichment analysis of differentially expressed genes between WT and *I $\kappa$ B $\alpha$* <sup>-/-</sup> in MSCs under basal condition.

Figure S1

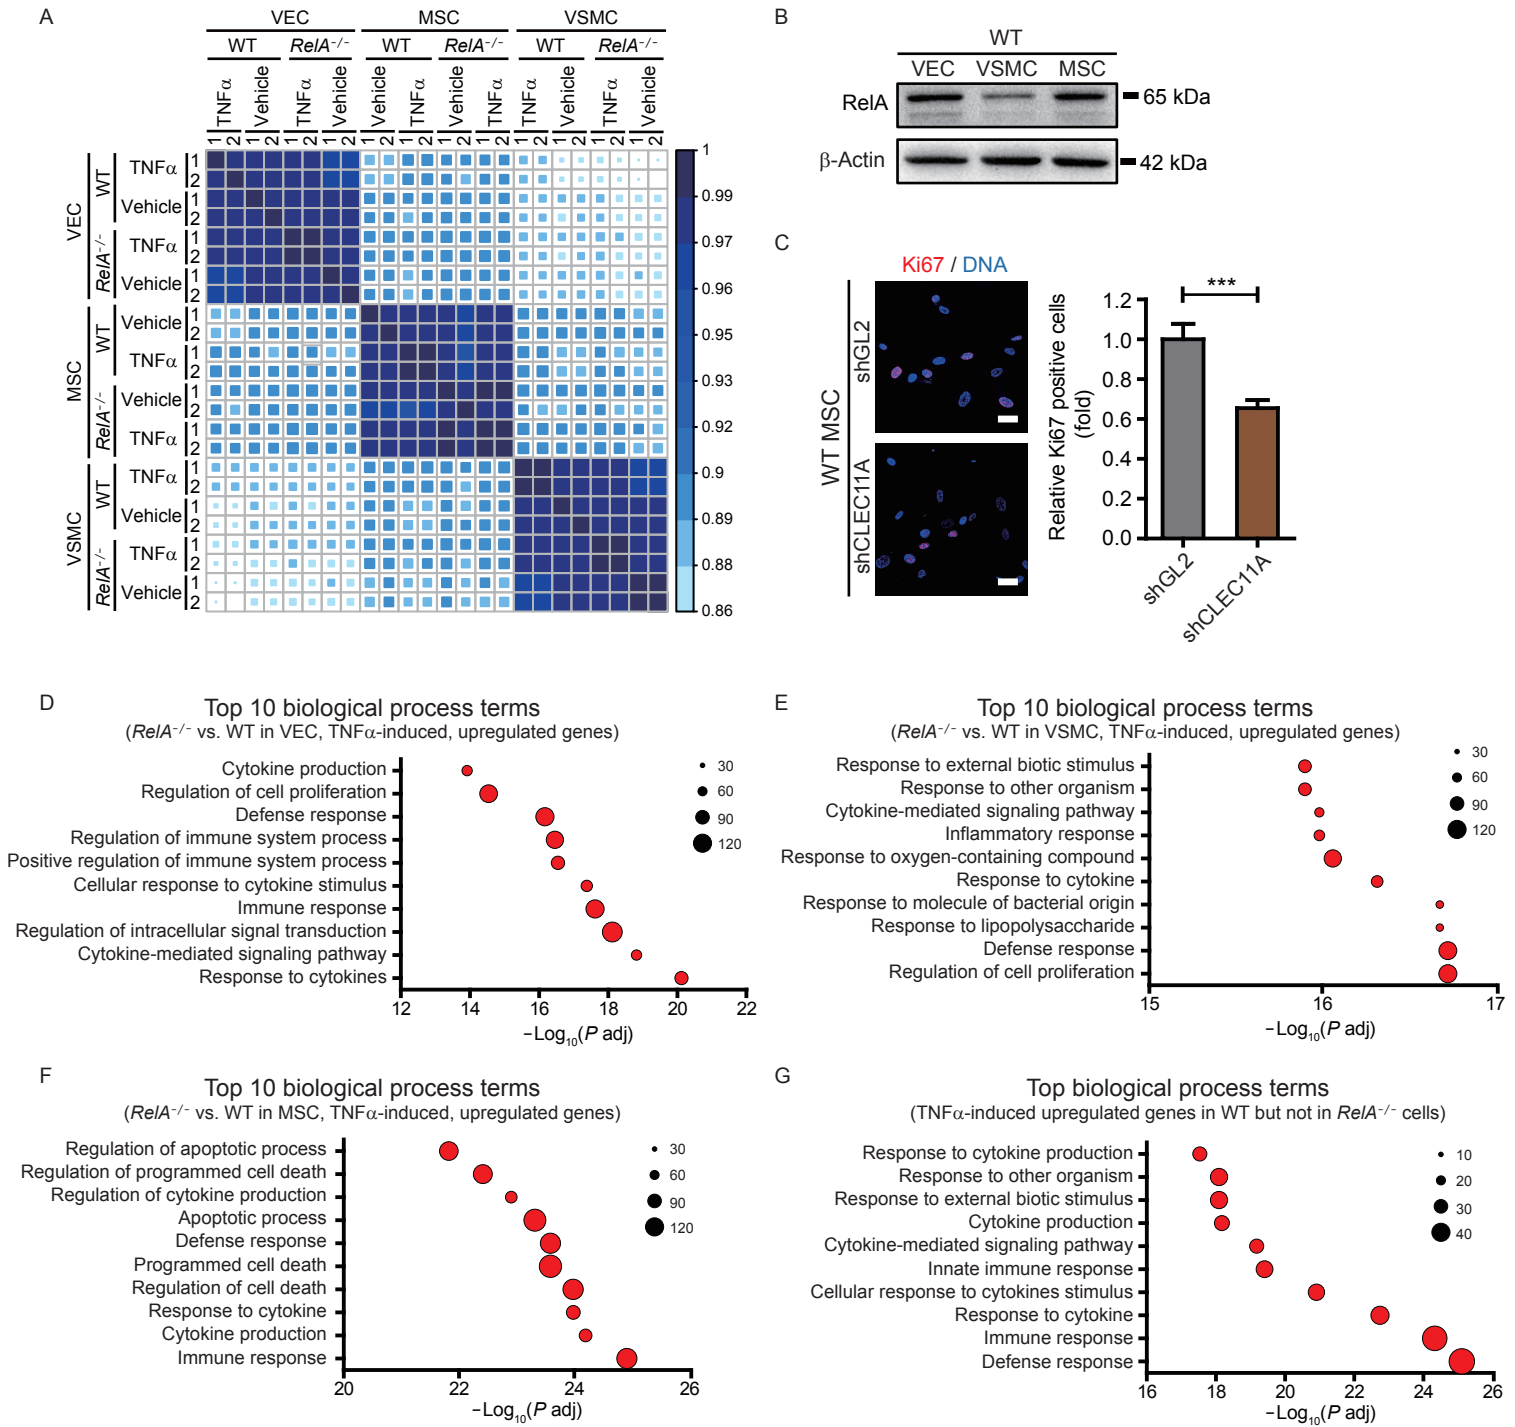

Figure S2

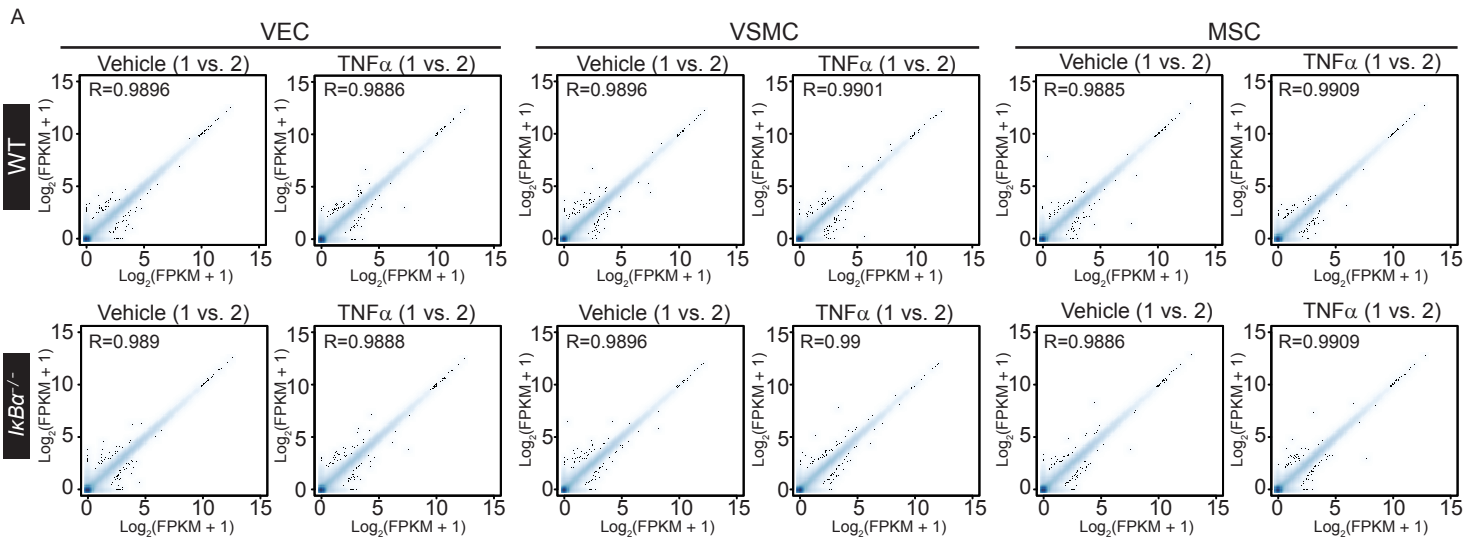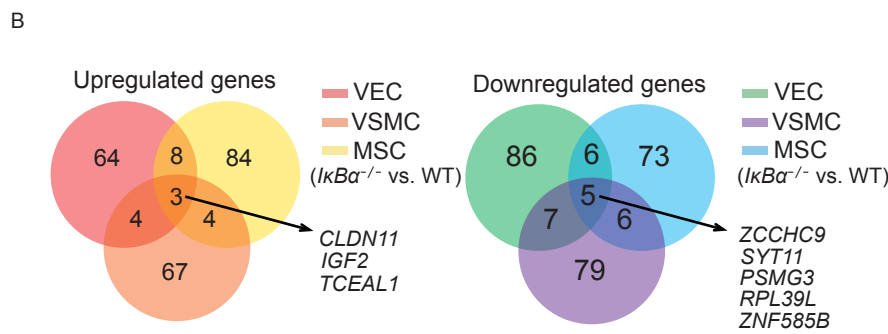

**C**

Top GO terms of biological process in VEC (*IkBa<sup>-/-</sup>* vs. WT, vehicle)

| Biological process                             | P value (adj) |
|------------------------------------------------|---------------|
| Extracellular matrix organization (14)         | 1.59E-7       |
| Positive regulation of leukocyte migration (7) | 4.94E-4       |
| Positive regulation of chemotaxis (7)          | 4.94E-4       |
| Collagen biosynthetic process (5)              | 4.94E-4       |
| Integrin-mediated signaling pathway (9)        | 6.01E-6       |
| Endothelial cell differentiation (7)           | 1.56E-3       |
| Smooth muscle cell migration (6)               | 2.35E-3       |
| Endothelium development (7)                    | 2.35E-3       |

**D**

Top GO terms of biological process in VSMC (*IkBa<sup>-/-</sup>* vs. WT, vehicle)

| Biological process                     | P value (adj) |
|----------------------------------------|---------------|
| Extracellular matrix organization (12) | 9.02E-6       |
| Response to muscle stretch (5)         | 6.86E-5       |
| Tube morphogenesis (12)                | 1.21E-4       |
| Response to TGF $\beta$ (10)           | 1.21E-4       |
| Epithelial tube morphogenesis(11)      | 1.47E-4       |

**E**

Top GO terms of biological process in MSC (*IkBa<sup>-/-</sup>* vs. WT, vehicle)

| Biological process                       | P value (adj) |
|------------------------------------------|---------------|
| Angiogenesis (18)                        | 7.68E-8       |
| Positive regulation of locomotion (16)   | 3.71E-6       |
| Response to lipopolysaccharide (13)      | 3.71E-6       |
| Chemokine-mediated signaling pathway (8) | 3.71E-6       |
| Extracellular matrix organization (11)   | 6.92E-7       |
